# Supplementary material for: Silole-spaced triarylamine derivatives as highly efficient organic sensitizers in dye-sensitized solar cells (DSSCs)
Source: Royal Society of Chemistry journal article supplement (doi:10.1039/b926163j), 2010-01-01
Supplement: b926163j.pdf [file b926163j.pdf]

## Supporting Information

For

### **Silole-spaced Triarylamine Derivatives as Highly Efficient Organic Sensitizers in Dye-Sensitized Solar Cells (DSSCs)**

Sangwon Ko, Hyunbong Choi,<sup>†</sup> Moon-Sung Kang,<sup>‡</sup> Hyonseok Hwang, Heesun Ji, Jinho Kim, Jaejung Ko<sup>†\*</sup> and Youngjin Kang<sup>\*</sup>

Division of Science Education & Department of Chemistry, Kangwon National University, Chuncheon 200-701, Republic of Korea

<sup>†</sup>Department of New Material Chemistry, Korea University, Jochiwon, Chungnam 339-700, Republic of Korea

<sup>‡</sup>Energy Lab, Samsung SDI Corporate R&D Center, 428-5 Gongse-dong, Giheung-gu, Yongin-si, Gyeonggi-do 449-577, Republic of Korea

## Contents

- Figure S1. Cyclic voltammetry of **7a** dye attached to a nanocrystalline TiO<sub>2</sub> film deposited on conducting FTO glass.
- Figure S2. Cyclic voltammetry of **7c** dye attached to a nanocrystalline TiO<sub>2</sub> film deposited on conducting FTO glass.
- Figure S3. A photocurrent voltage curve obtained with a DSSC based on **7a** (red line), **7b** (green line), **7c** (blue line) and **JK-2** (black line) under AM 1.5 radiation. The dark current/bias potential relationship is shown as dotted curves.

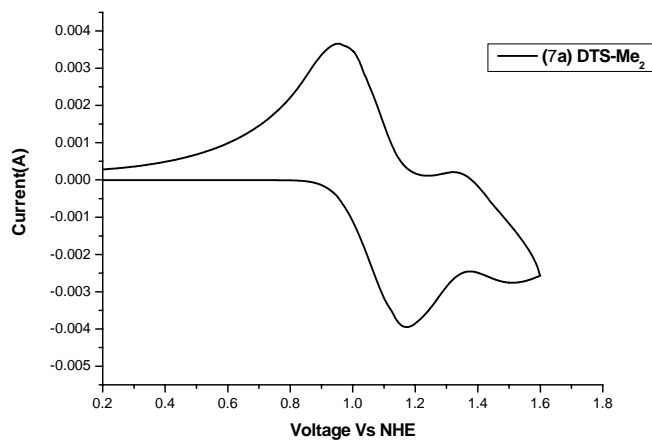

Figure S1. Cyclic voltammetry of **7a** dye attached to a nanocrystalline TiO<sub>2</sub> film deposited on conducting FTO glass.

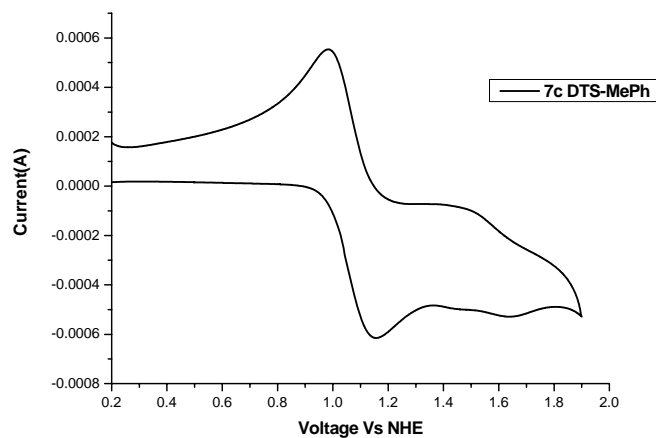

Figure S2. Cyclic voltammetry of **7c** dye attached to a nanocrystalline TiO<sub>2</sub> film deposited on conducting FTO glass.

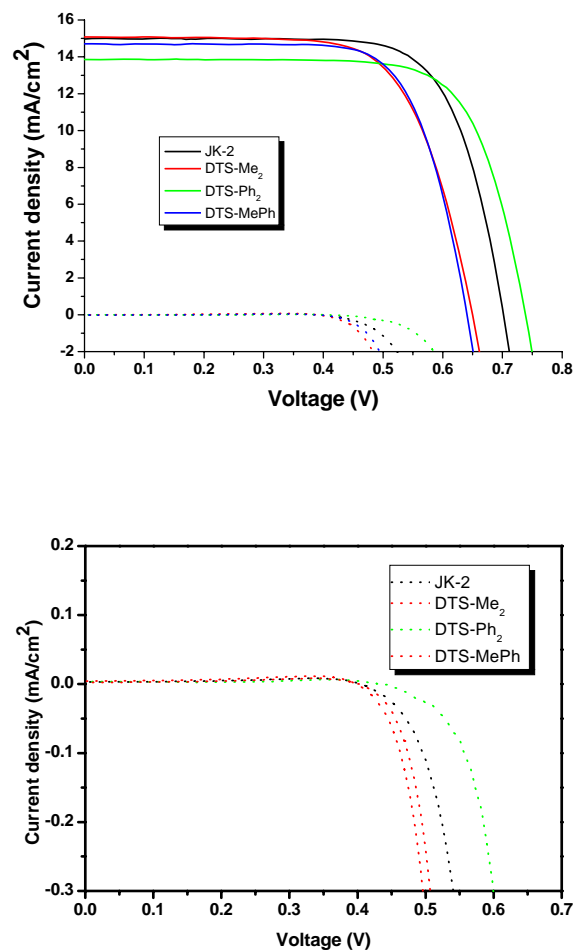

Figure S3. A photocurrent voltage curve obtained with a DSSC based on **7a** (red line), **7b** (green line), **7c** (blue line) and **JK-2** (black line) under AM 1.5 radiation. The dark current/bias potential relationship is shown as dotted curves
